# Supplementary material for: Enhanced Cytotoxic Effect of Doxorubicin Conjugated to Glutathione-Stabilized Gold Nanoparticles in Canine Osteosarcoma—In Vitro Studies
Source: MDPI journal article supplement (doi:10.3390/molecules26123487), 2021-06-08

# SUPPLEMENTARY MATERIALS

Supplementary materials S3. Contrast-phase images of osteosarcoma cell lines: D17, x4, scale bar 200  $\mu\text{m}$  (A), D17, x20, scale bar 50  $\mu\text{m}$  (B), U2OS, x4, scale bar 200  $\mu\text{m}$  (C), U2OS, x20, scale bar 50  $\mu\text{m}$  (D), treated with increasing doses of Au-GSH, Au-GSH-Dox and Dox. Signs of apoptosis were observed: detached cells (red, long arrows), cell shrinkage (red arrowheads), membrane blebbing (red asterisks).

A

Au-GSH

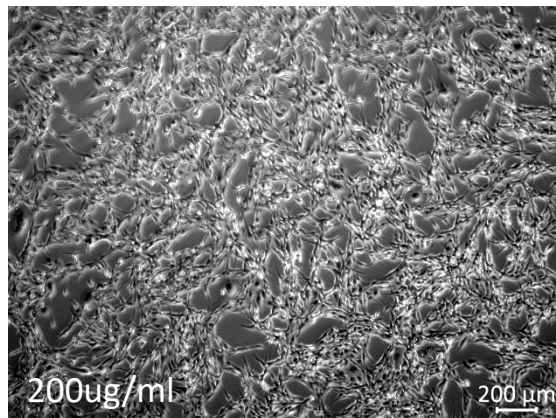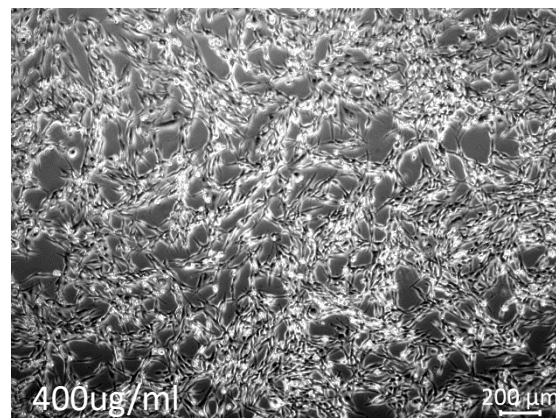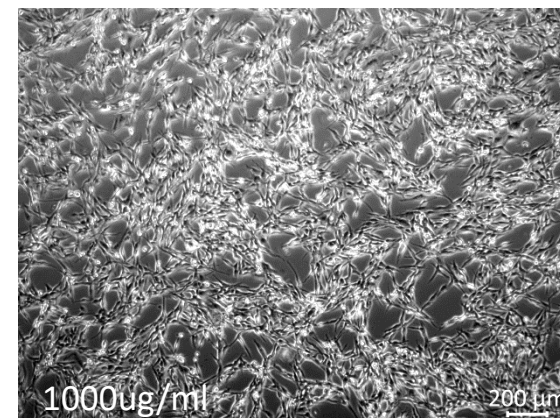

Au-GSH-Dox

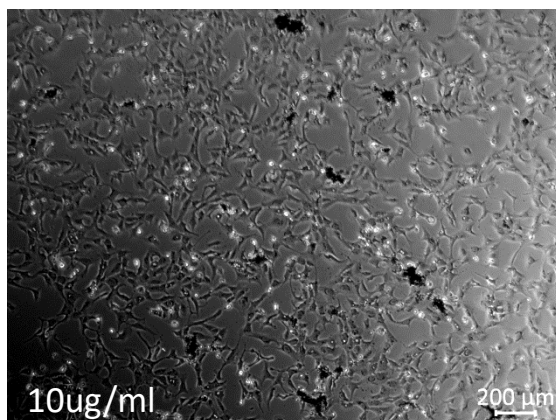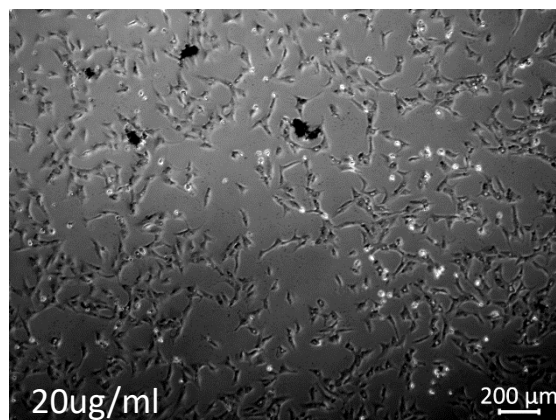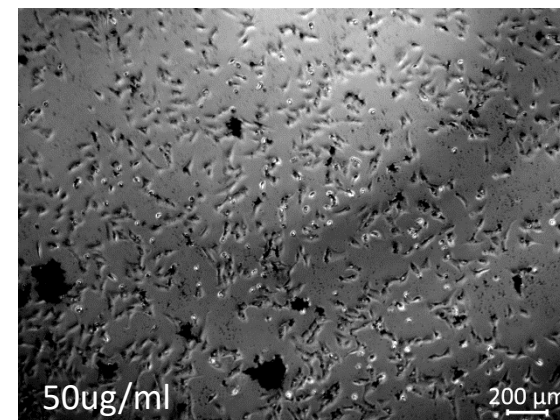

Dox

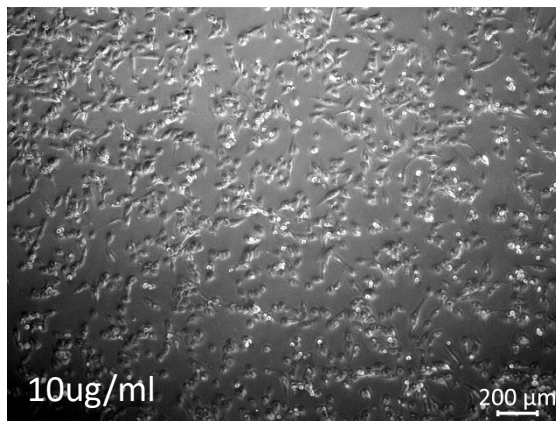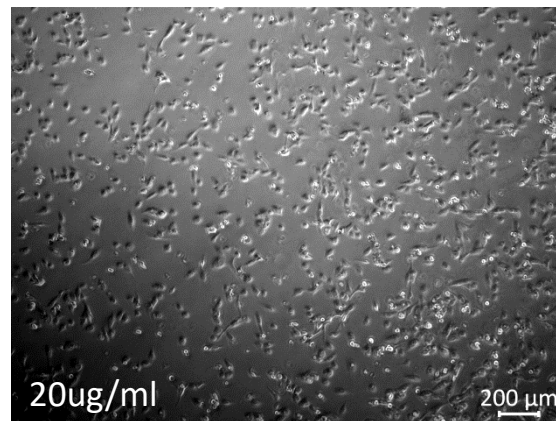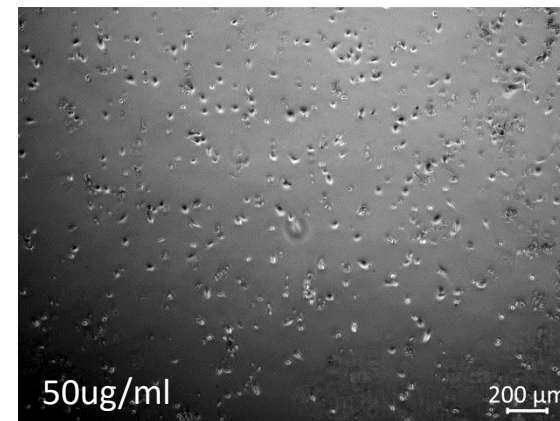



B

Au-GSH

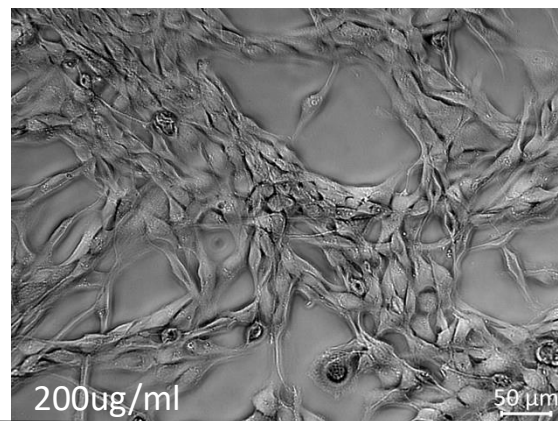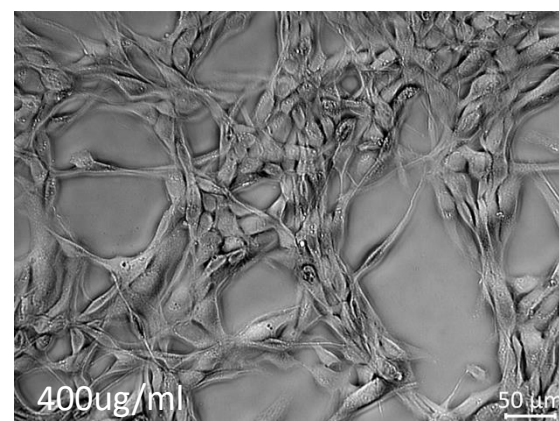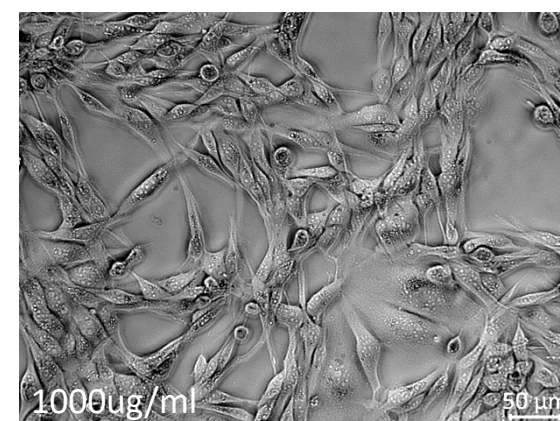

Au-GSH-Dox

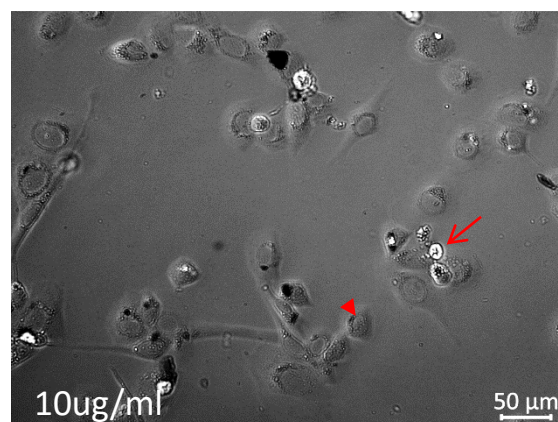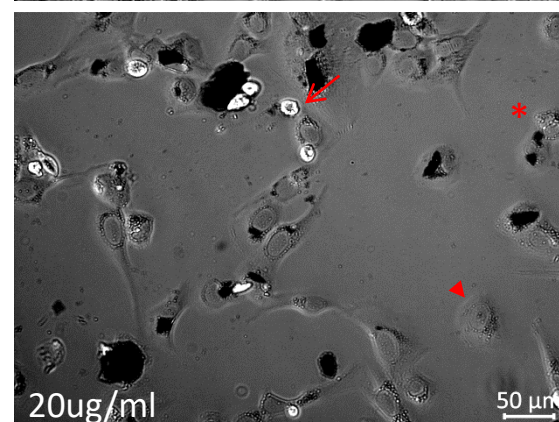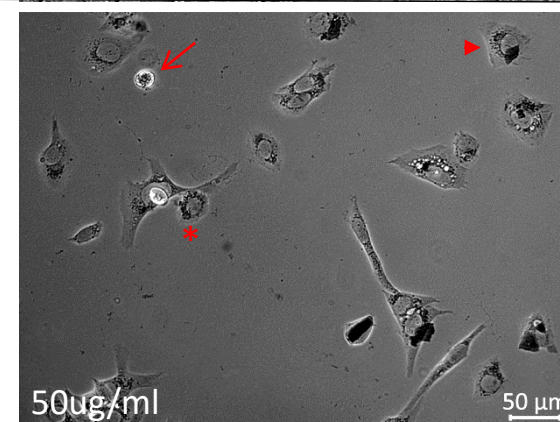

Dox

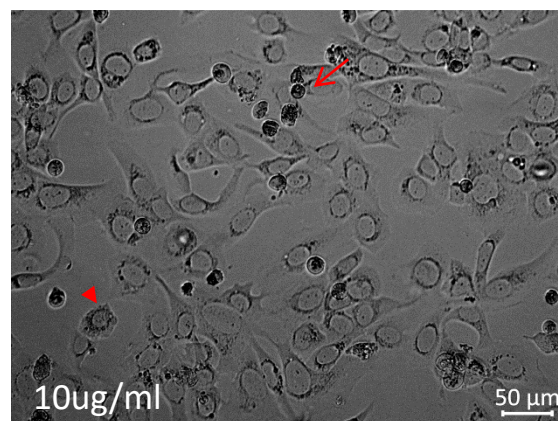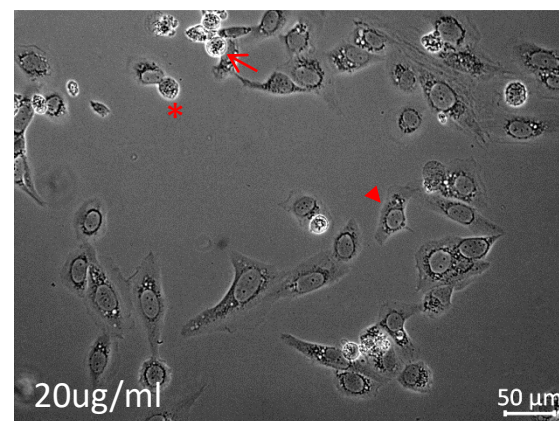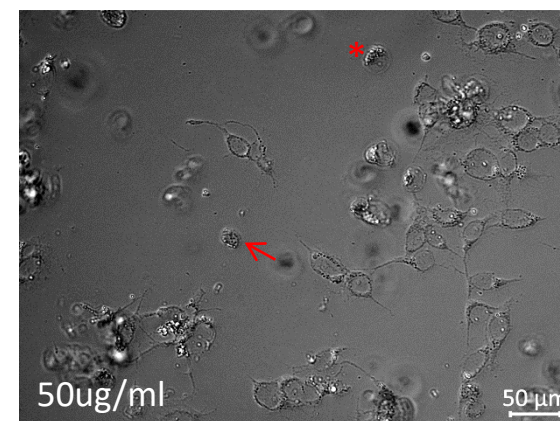



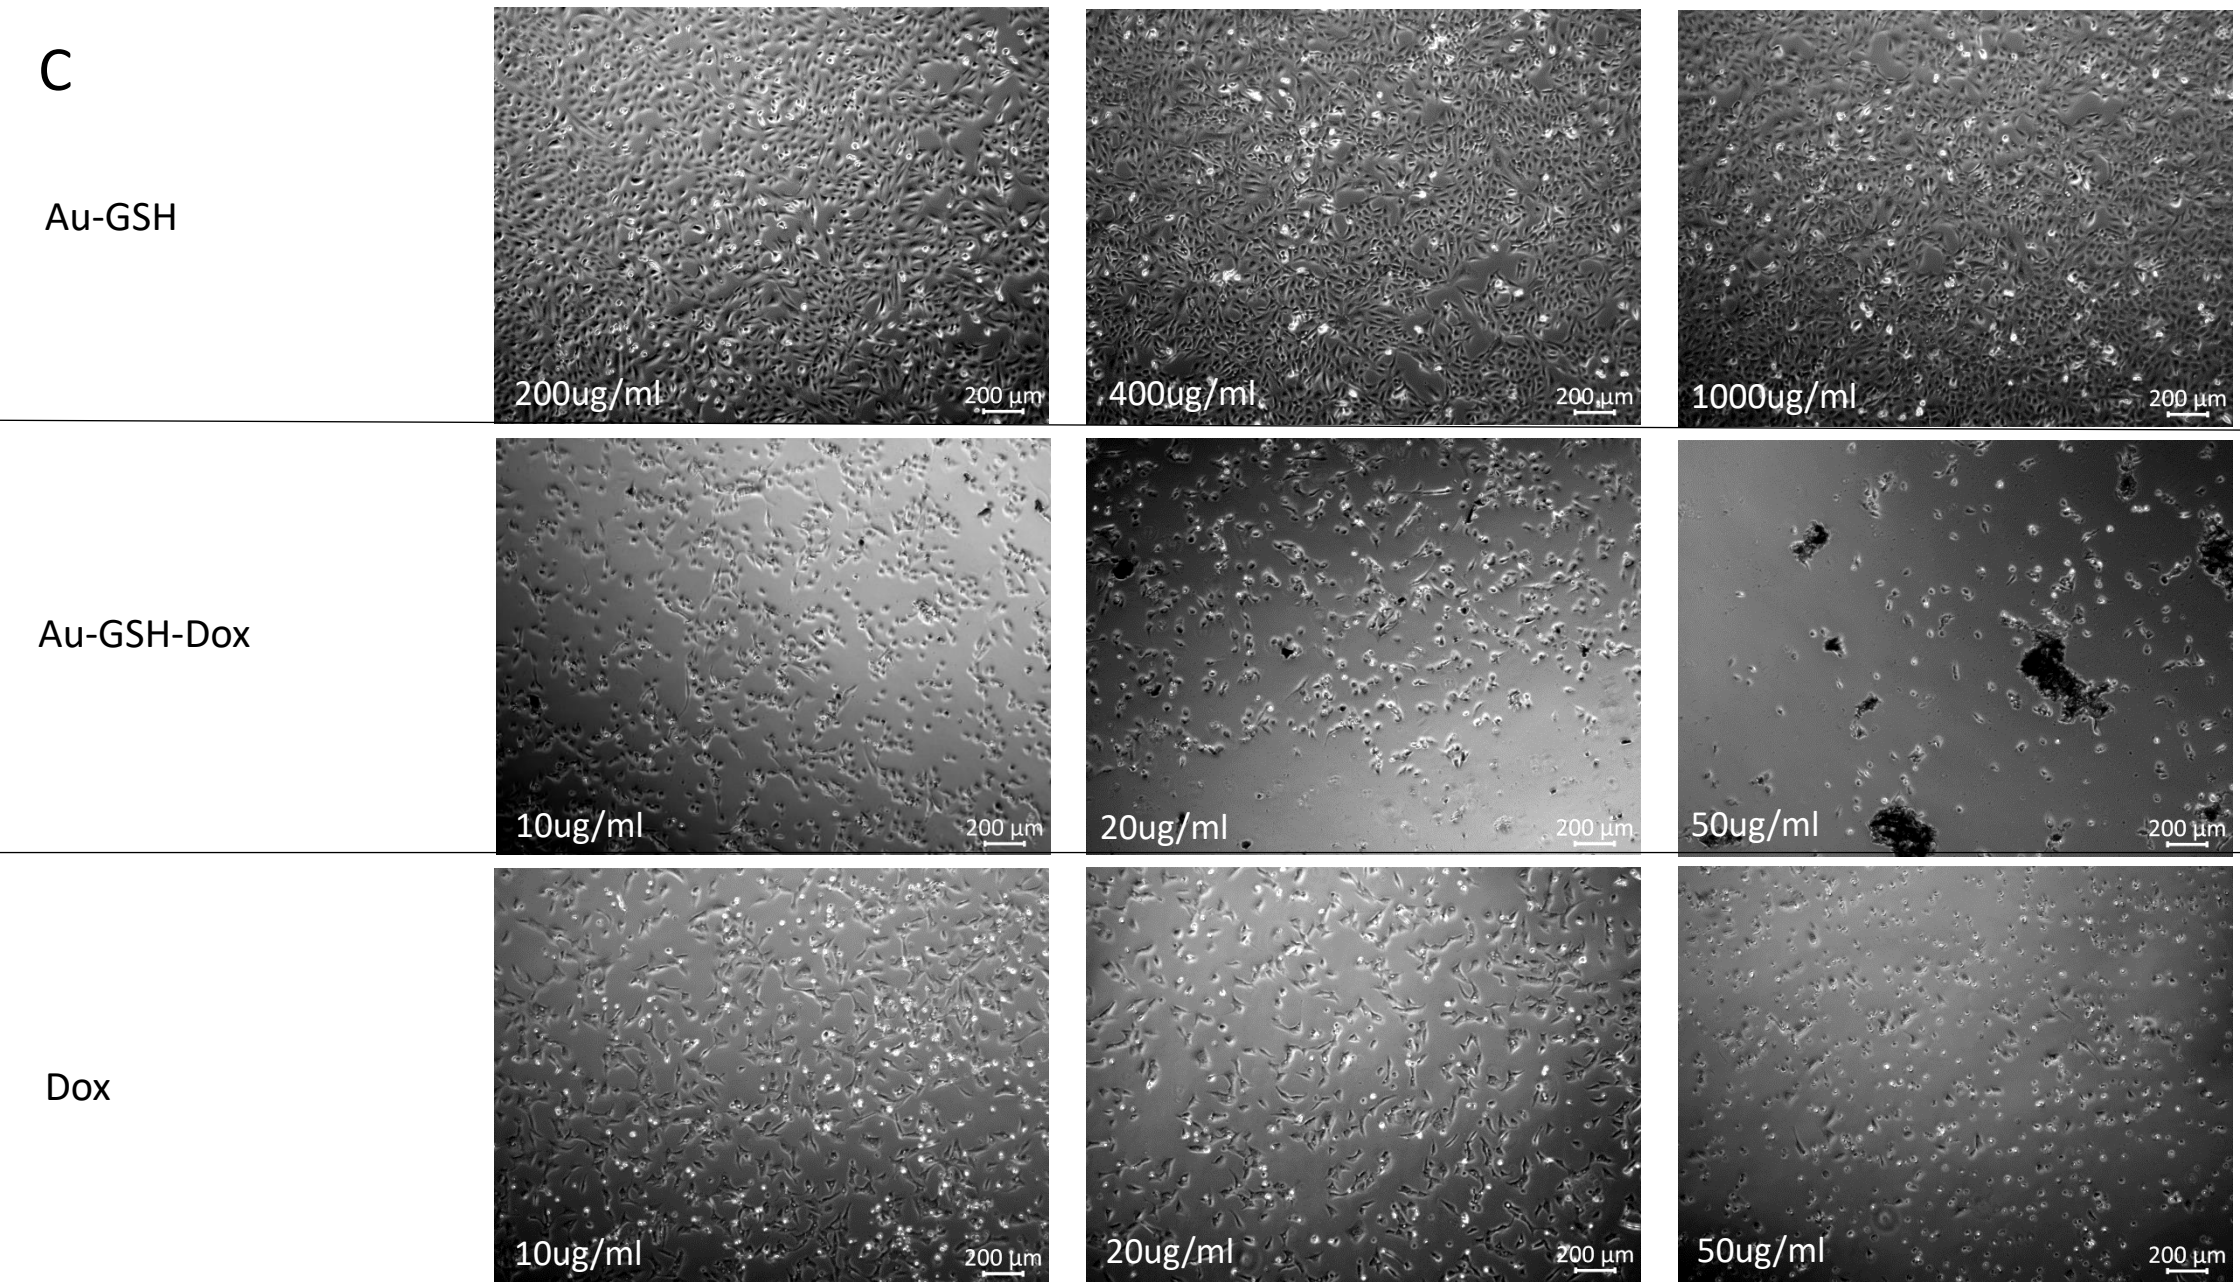



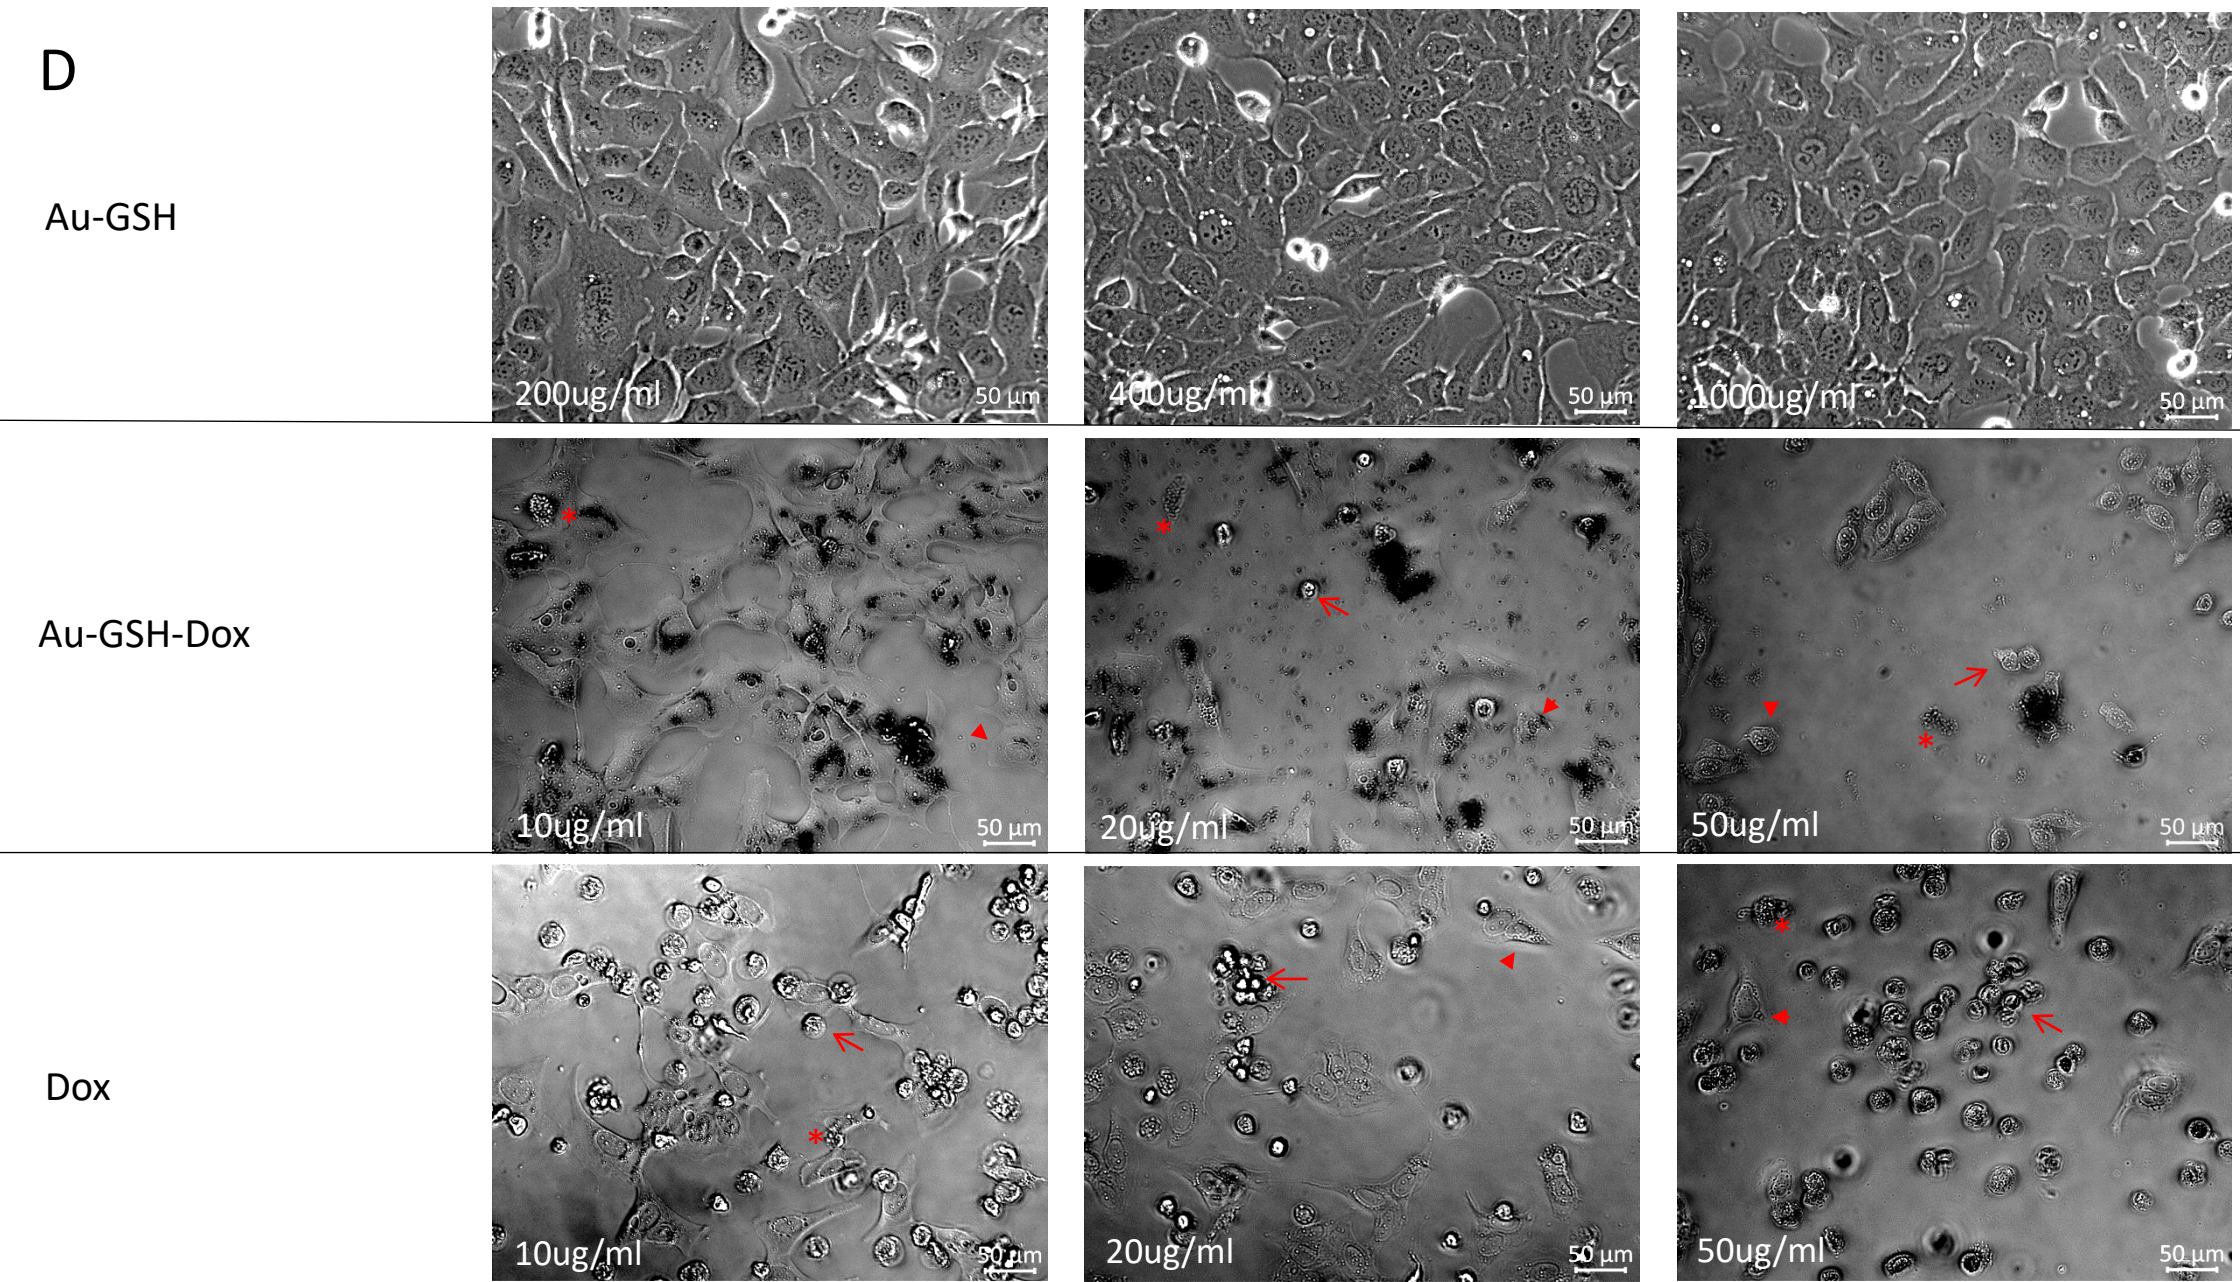

Supplement: s1 [file s1]
