# Supplementary material for: Enhanced Cytotoxic Effect of Doxorubicin Conjugated to Glutathione-Stabilized Gold Nanoparticles in Canine Osteosarcoma—In Vitro Studies
Source: MDPI journal article supplement (doi:10.3390/molecules26123487), 2021-06-08

# SUPPLEMENTARY MATERIALS

Supplementary materials S2. Effect of Au-GSH on the mortality (% +/- SEM) of tested cell lines: D17 (A) U2OS (B).

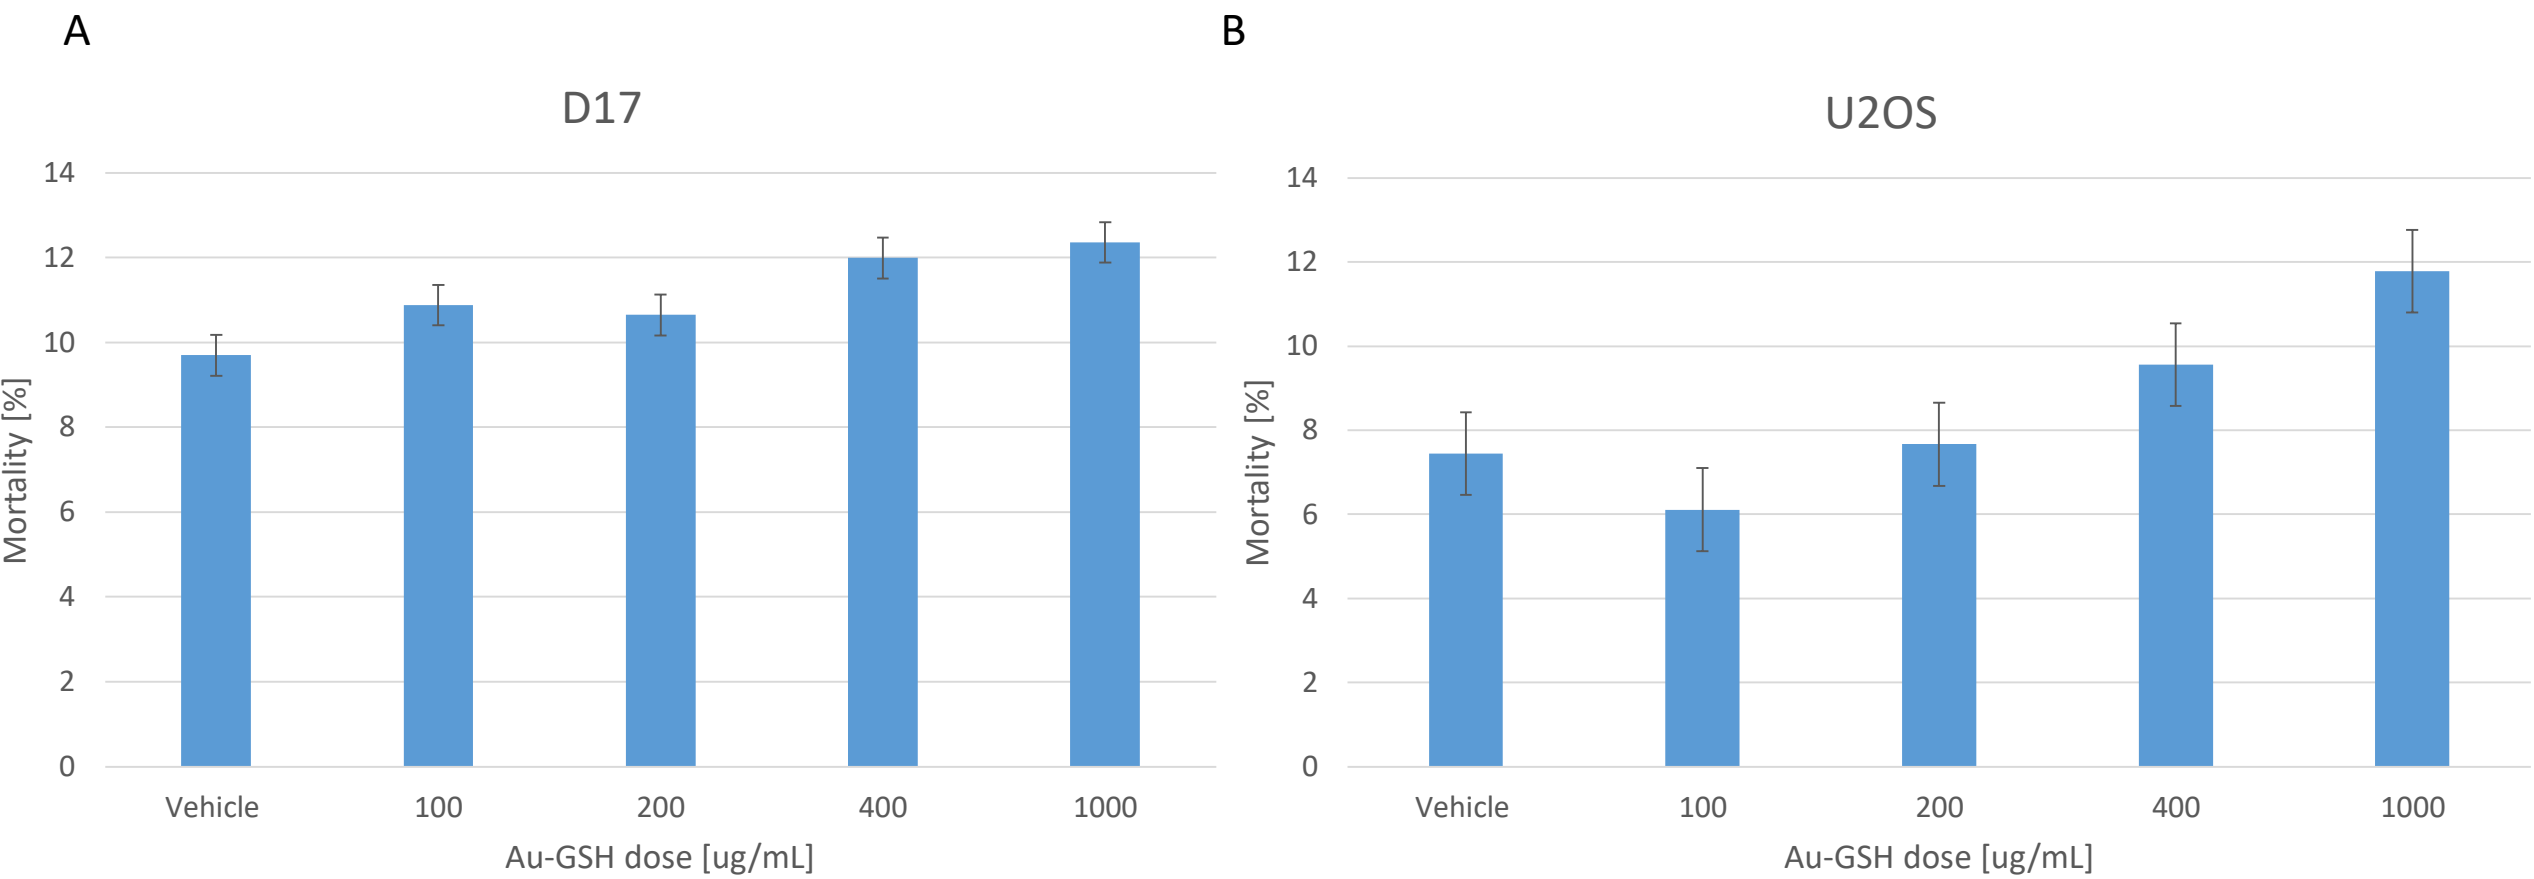

Supplement: s1 [file s1]
