# Supplementary material for: Enhanced Cytotoxic Effect of Doxorubicin Conjugated to Glutathione-Stabilized Gold Nanoparticles in Canine Osteosarcoma—In Vitro Studies
Source: MDPI journal article supplement (doi:10.3390/molecules26123487), 2021-06-08

# SUPPLEMENTARY MATERIALS

Supplementary materials S1. MTT assay - cell viability (% +/- SEM) after the 24h treatment with Au-GSH for D17 (A) and U2OS (B) cell lines.

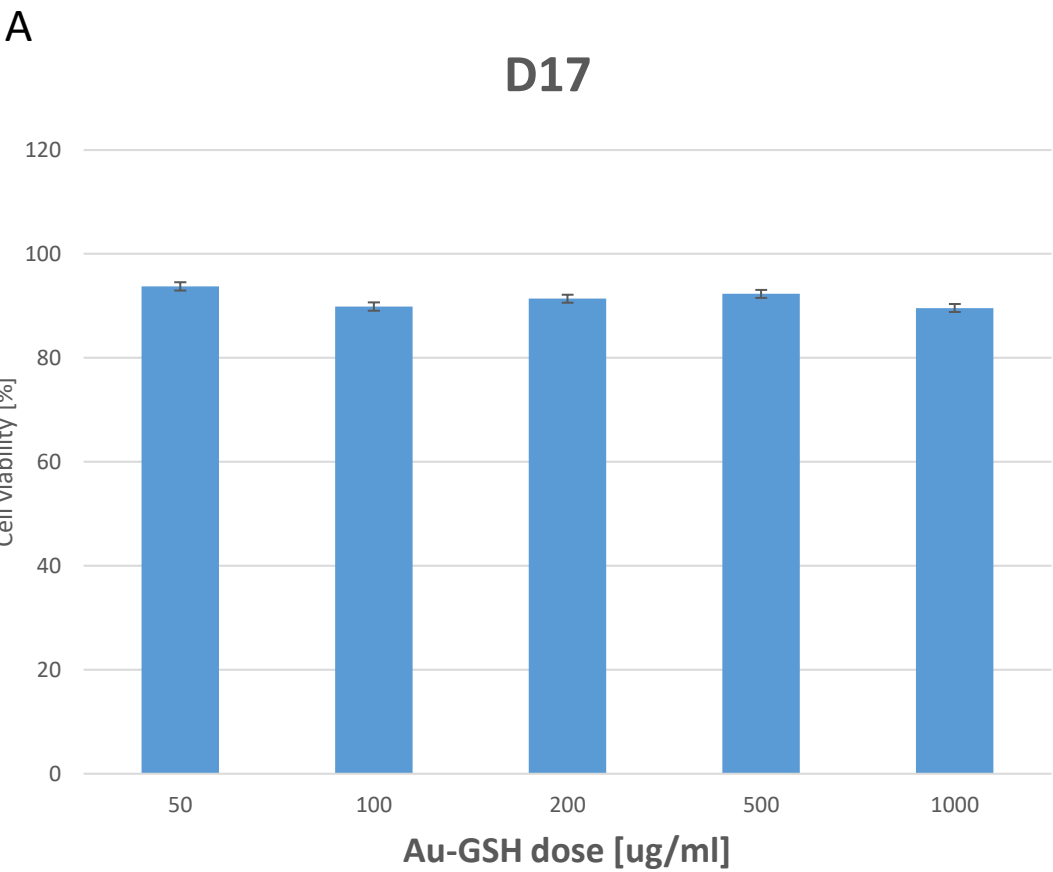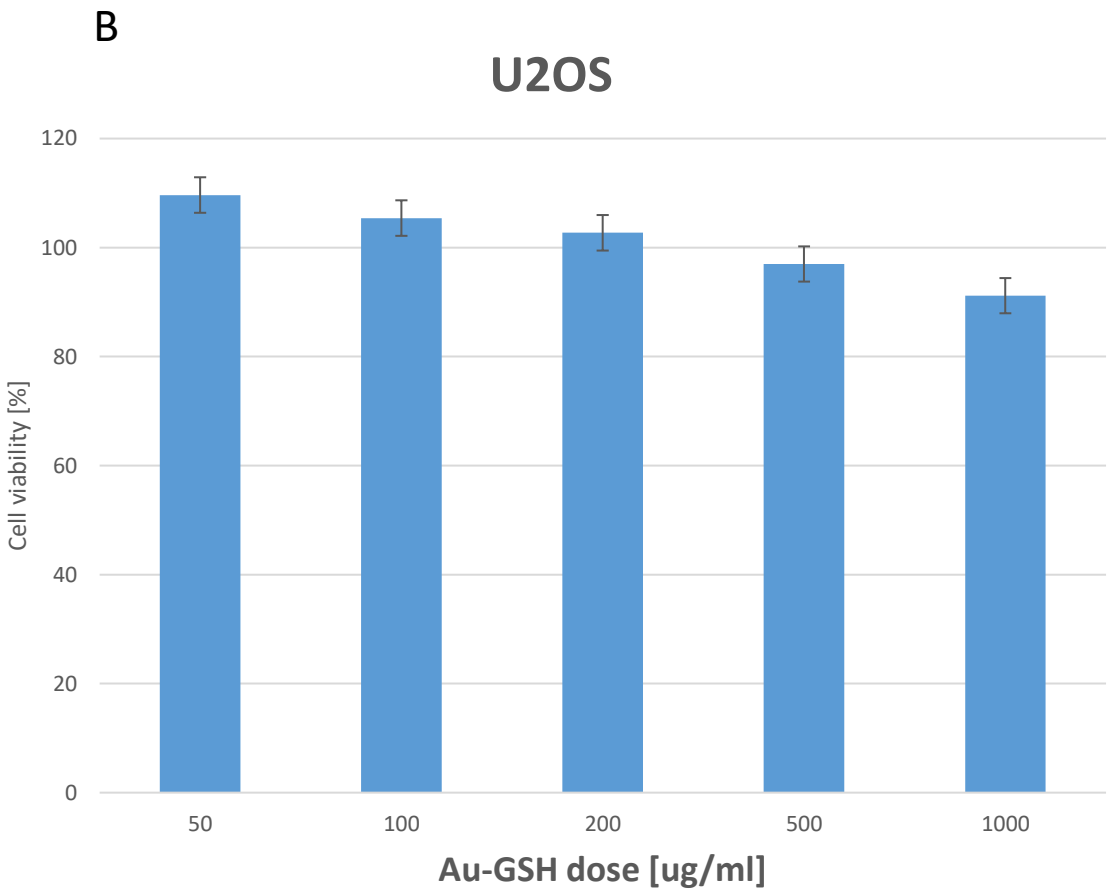

Supplement: s1 [file s1]
